# Supplementary material for: Epitranscriptomic N6-Methyladenosine Profile of SARS-CoV-2-Infected Human Lung Epithelial Cells
Source: PubMed Central journal article supplement (PMC9927293; doi:10.1128/spectrum.03943-22), 2023-01-10
Supplement: spectrum.03943-22-s0001.pdf [file spectrum.03943-22-s0001.pdf]

Epitranscriptomic  $N^6$ -methyladenosine profile of SARS-CoV-2-infected human lung epithelial cells

Stacia Phillips, Tarun Mishra, Shaubhagya Khadka, Dana Bohan, Constanza E. Espada, Wendy Maury, and Li Wu

**Supplemental Tables** (three separate Excel files)

**Table S1:** All differentially  $m^6a$ -modified transcripts in SARS-CoV-2-infected A549-hACE2 cells vs. mock-infected control cells.

**Table S2:** All pathways associated with at least one differentially methylated mRNA in SARS-CoV-2-infected A549-hACE2 cell vs. mock-infected control cells.

**Table S3:** Primer sequences used for qPCR amplification of selected targets.
